# Supplementary material for: A History of Heart Failure Is an Independent Risk Factor for Death in Patients Admitted with Coronavirus 19 Disease
Source: MDPI journal article supplement (doi:10.3390/jcdd8070077), 2021-06-30
Supplement: s1 [file s1]

**Supplemental Table I.** Characteristics of heart failure patients admitted with COVID-19

|                                    | <b>HFpEF</b>          | <b>HFrfEF</b>         | <b>p</b> |
|------------------------------------|-----------------------|-----------------------|----------|
|                                    | <b>n=221</b>          | <b>n=114</b>          |          |
| <b>Demographics</b>                |                       |                       |          |
| Age, year                          | 74 (65 - 83)          | 73 (65.8 - 79.3)      | 0.256    |
| Male gender, no (%)                | 113/221 (51.1)        | 77/114 (67.5)         | 0.004    |
| BMI (kg/m <sup>2</sup> )           | 28.4 (24.6 - 33.8)    | 26.7 (23 - 31.2)      | 0.017    |
| <b>Past Medical History</b>        |                       |                       |          |
| Diabetes, no (%)                   | 162/221 (73.3)        | 85/114 (74.6)         | 0.804    |
| Hypertension, no (%)               | 203/221 (91.9)        | 105/114 (92.1)        | 0.937    |
| CAD, no (%)                        | 158/221 (71.5)        | 91/114 (79.8)         | 0.098    |
| Asthma/COPD, no (%)                | 130/221 (58.8)        | 46/114 (40.4)         | 0.001    |
| <b>Presentation</b>                |                       |                       |          |
| Symptom duration, days             | 2 (0 - 7)             | 2 (0 - 7)             | 0.294    |
| Temperature, F                     | 98.8 (98 - 100)       | 98.5 (97.8 - 99.7)    | 0.041    |
| Systolic BP, mmHg                  | 134 (116 - 149)       | 127 (104 - 144)       | 0.015    |
| Diastolic BP, mmHg                 | 73 (61 - 82)          | 72 (58.5 - 81.5)      | 0.757    |
| HR, bpm                            | 93 (80 - 106.5)       | 90 (74 - 106)         | 0.129    |
| Pulse oximeter saturation, %       | 95 (91 - 98)          | 96 (92 - 99)          | 0.187    |
| Respiratory rate, bpm              | 20 (18 - 24)          | 20 (18 - 24)          | 0.425    |
| WBC count, k/ $\mu$ L              | 7.3 (5.3 - 10.6)      | 7.9 (5.4 - 10.2)      | 0.662    |
| Lymphocytes count, k/ $\mu$ L      | 1 (0.7 - 1.3)         | 1 (0.6 - 1.4)         | 0.8      |
| Hemoglobin, g/dL                   | 12.1 (10.2 - 13.9)    | 11.6 (10.2 - 13.4)    | 0.319    |
| Platelet count, k/ $\mu$ L         | 170 (118 - 242.5)     | 169 (91 - 244)        | 0.83     |
| Sodium, mEq/L                      | 137 (133 - 142)       | 138 (135 - 141)       | 0.845    |
| Potassium, mEq/L                   | 4.6 (4.1 - 4.9)       | 4.6 (4.2 - 5.1)       | 0.397    |
| Chloride, mEq/L                    | 99 (95 - 104)         | 99 (95 - 103)         | 0.68     |
| Bicarbonate, mEq/L                 | 25 (21 - 28)          | 24 (21 - 27)          | 0.403    |
| EGFR, mL/min/BSA                   | 40.9 (23.7 - 62.5)    | 40.2 (20.1 - 56.9)    | 0.275    |
| AST, U/L                           | 36 (25.3 - 56)        | 36 (24 - 61.5)        | 0.857    |
| ALT, U/L                           | 22 (14 - 36)          | 25 (14 - 35.5)        | 0.369    |
| Lactic acid, mmol/L                | 2.2 (1.6 - 2.9)       | 2.4 (1.7 - 3.7)       | -0.044   |
| Creatinine Kinase, U/L             | 151 (74.8 - 334.3)    | 148 (77.3 - 366.8)    | 0.919    |
| ProBNP, pg/mL                      | 2328 (877.5 - 5411.5) | 5416 (1371.5 - 15000) | 0.001    |
| D-dimer, $\mu$ g/mL                | 2.1 (1.1 - 5)         | 3.3 (1.4 - 7.6)       | 0.19     |
| C-reactive protein, $\mu$ g/mL     | 10 (3.5 - 21.3)       | 10.3 (6 - 22.3)       | 0.397    |
| LDH, U/L                           | 379 (280 - 556)       | 412 (303 - 570)       | 0.415    |
| Ferritin, ng/mL                    | 620 (329.3 - 1308)    | 593 (241 - 1027.8)    | 0.449    |
| IL6, pg/mL                         | 42.3 (18.9 - 110.5)   | 39 (17.7 - 89.1)      | 0.624    |
| Procalcitonin, ng/mL               | 0.3 (0.1 - 0.9)       | 0.4 (0.1 - 1.6)       | 0.729    |
| Troponin T, ng/mL                  | 0.02 (0.01 - 0.06)    | 0.04 (0.01 - 0.1)     | 0.006    |
| <b>Treatments during admission</b> |                       |                       |          |
| Beta Blocker                       | 129/221 (58.4)        | 76/114 (66.7)         | 0.140    |
| ACE-i                              | 22/221 (10.0)         | 19/114 (16.7)         | 0.076    |
| ARBs                               | 15/221 (6.8)          | 7/114 (6.1)           | 0.821    |
| Pressors, no (%)                   | 49/221 (22.2)         | 25/114 (21.9)         | 0.960    |
| Inotropes, no (%)                  | 3/221 (1.4)           | 11/114 (9.6)          | 0.000    |
| Hydroxychloroquine, no (%)         | 141/221 (63.8)        | 62/114 (54.4)         | 0.095    |
| Chloroquine, no (%)                | 3/221 (1.4)           | 3/114 (2.6)           | 0.405    |
| Azithromycin, no (%)               | 59/221 (26.7)         | 25/114 (21.9)         | 0.34     |
| Other antibiotics, no (%)          | 172/221 (77.8)        | 90/114 (78.9)         | 0.814    |
| IV steroids, no (%)                | 61/221 (27.6)         | 17/114 (14.9)         | 0.009    |

ACE-I = Angiotensin converting enzyme inhibitor; ALT= Alanine transaminase; ARBs = Angiotensin II receptor blocker; BMI = Body mass index; BP = Blood pressure; CAD = Coronary artery disease; COPD = Chronic obstructive pulmonary disease; EGFR = Estimated glomerular filtration rate; F= Fahrenheit; G6PD = Glucose-6-phosphate dehydrogenase deficiency; HFpEF = Heart failure with preserved ejection fraction; HFrEF = Heart failure with reduced ejection fraction; HR = Heart rate; IL-6 = Interleukin 6; IV= Intravenous; LDH = Lactate dehydrogenase; proBNP = ProB-type Natriuretic Peptide; WBC = White blood cell.

**Supplemental Table II.** Demographics and past medical history of propensity matched patients

|                             | Without<br>Heart Failure<br>n=328 | With<br>Heart Failure<br>n=328 | P    |
|-----------------------------|-----------------------------------|--------------------------------|------|
| <b>Demographics</b>         |                                   |                                |      |
| Age, year                   | 73 (65 - 80)                      | 73 (65 - 81)                   | 0.36 |
| BMI (kg/m <sup>2</sup> )    | 28.8 (25 - 33)                    | 28 (24.1 - 33)                 | 0.39 |
| <b>Past Medical History</b> |                                   |                                |      |
| Diabetes, no (%)            | 250/328 (76.2)                    | 243/328 (74.1)                 | 0.53 |
| Hypertension, no (%)        | 301/328 (91.8)                    | 302/328 (92.1)                 | 0.89 |
| CAD, no (%)                 | 243/328 (74.1)                    | 244/328 (74.4)                 | 0.93 |
| Asthma/COPD, no (%)         | 175/328 (53.4)                    | 173/328 (52.7)                 | 0.88 |

BMI = Body mass index; CAD = Coronary artery disease; COPD = Chronic obstructive pulmonary disease.

**Standardized differences before matching**

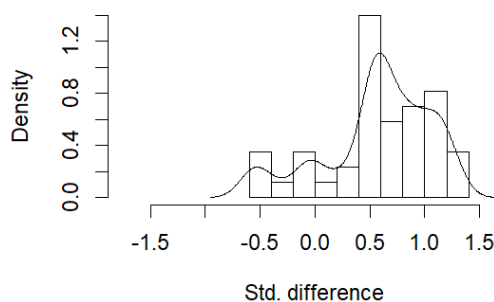

**Standardized differences after matching**

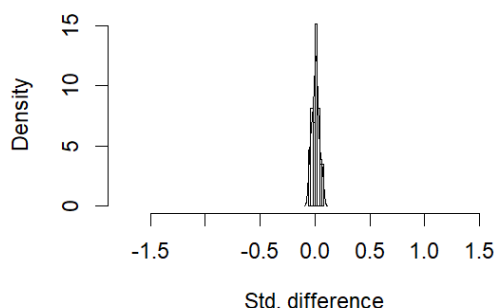

**Supplemental Figure I.** Standardized differences of covariates before and after propensity matching score.

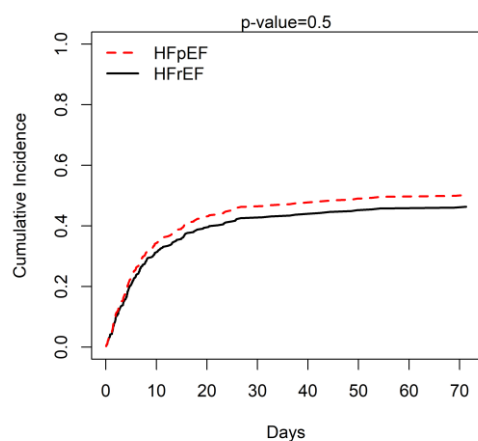

(A) Mortality

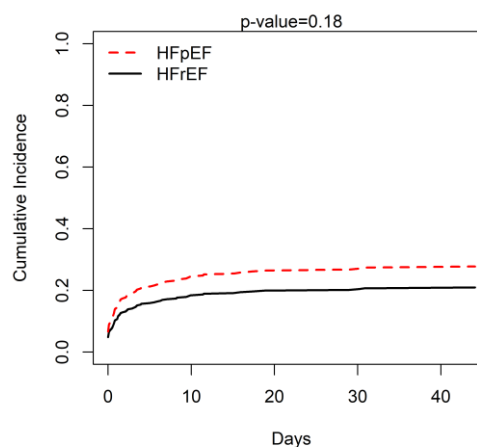

(B) Intubation

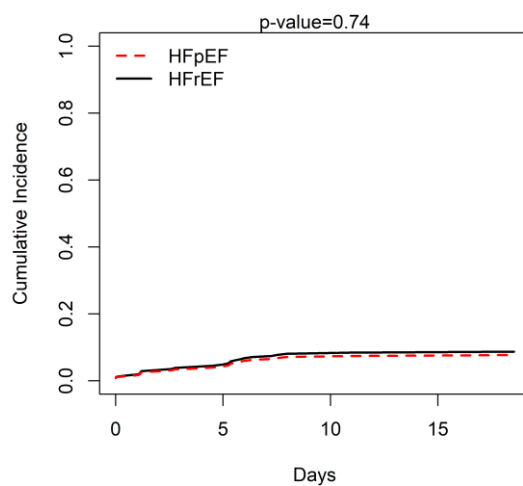

(C) New Dialysis

**Supplemental Figure II.** Cumulative incidence of in-hospital (A) mortality, (B) need for intubation, (C) need for intubation in heart failure with reduced ejection fraction (HFrEF) and heart failure with preserved ejection fraction (HFpEF) patients.
